# Supplementary material
Source: publisher figshare collection journal article supplement (https://karger.figshare.com/ndownloader/files/14863469)
Supplement: Supplementary file 1 [file 14863469]

1 **Supplemental Material**

2 **Figure 4: Block Span Forest Plot**

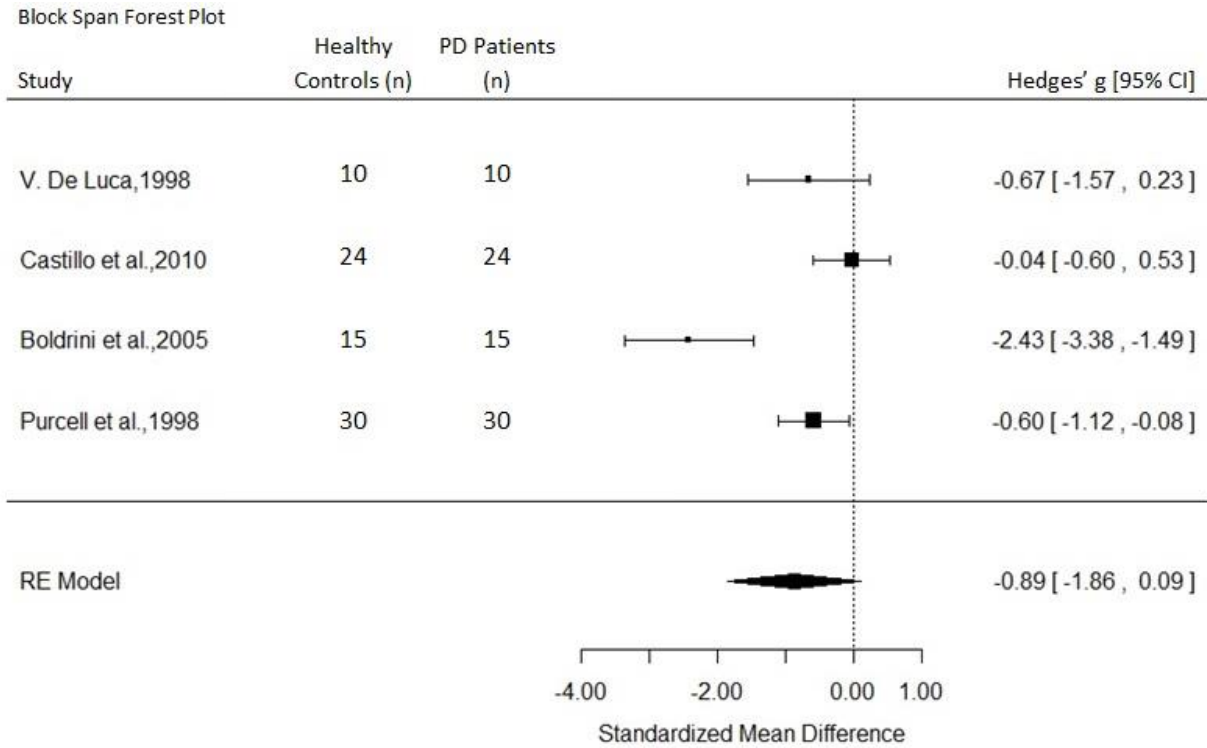

3

4 **References: De Luca et al. (30)**

5

6 **Figure 5: Digit Span Forest Plot**

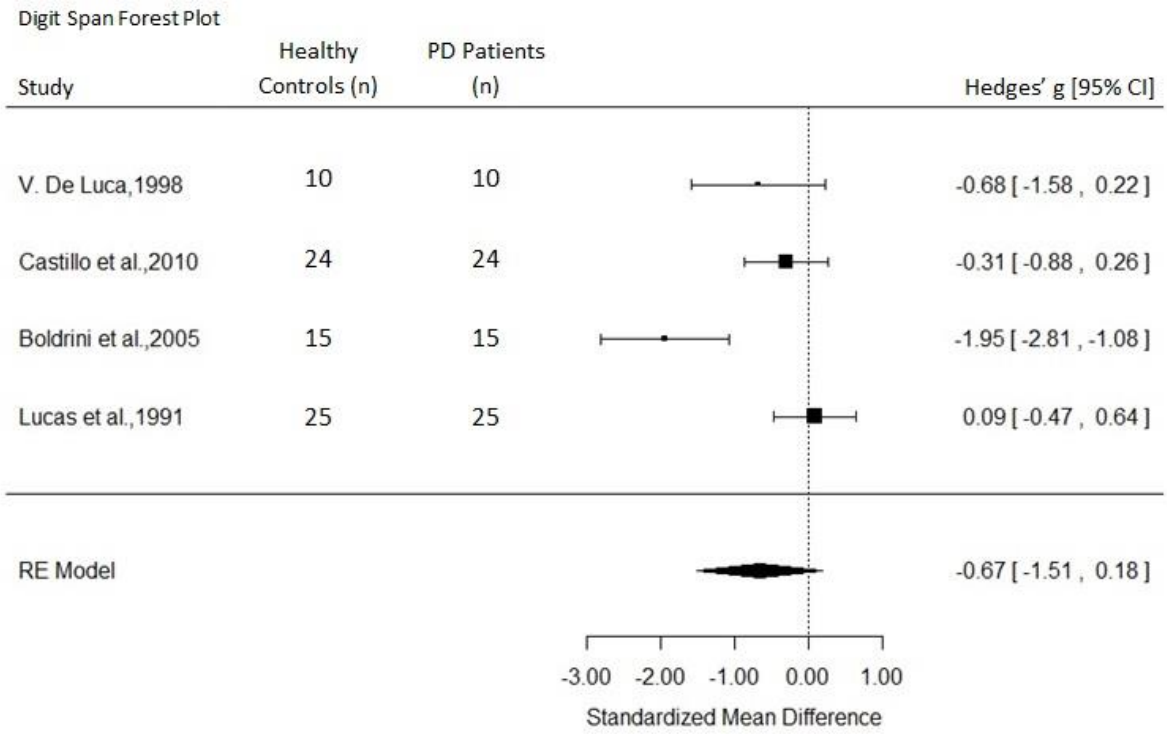

7

8

9 **Figure 6: Verbal IQ Forest Plot**

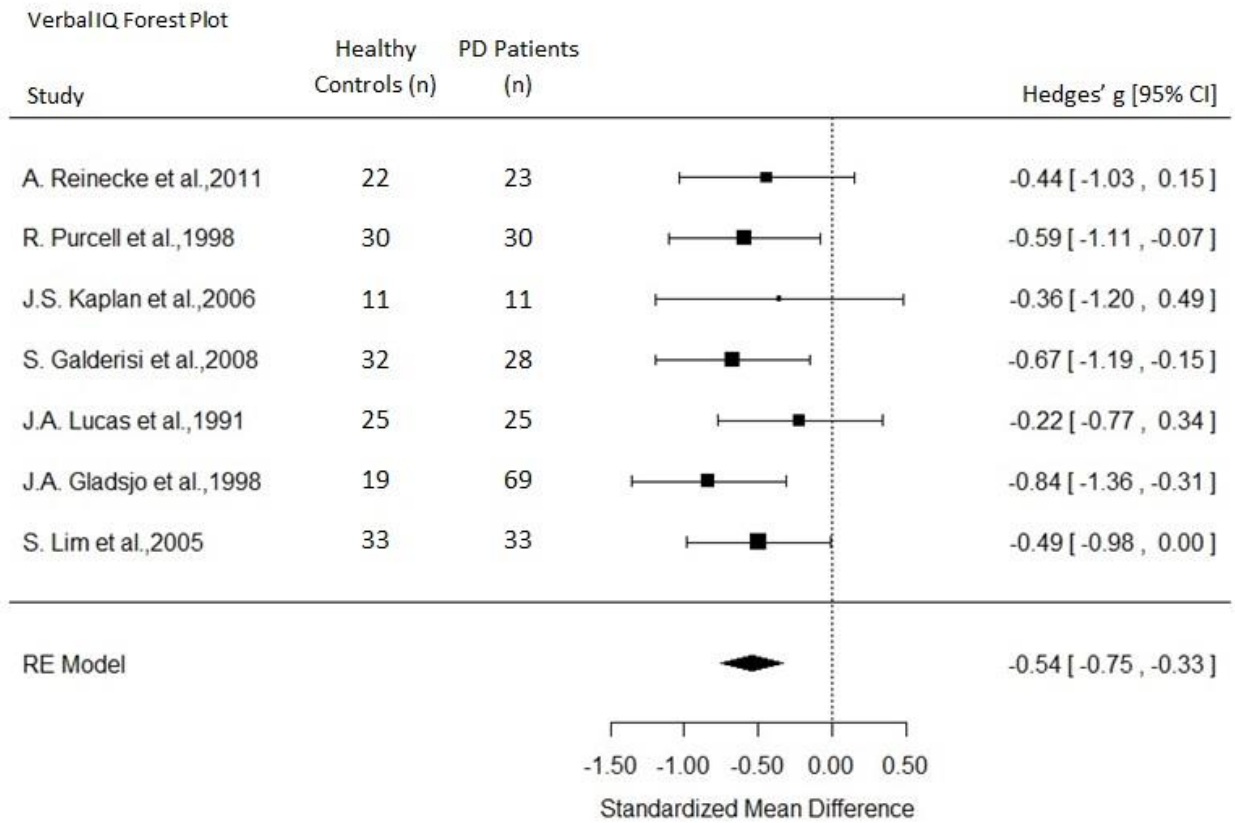

10

11

12 **References: Gladsjo et al. (31); Kaplan et al. (32); Purcell at al. (34); Reinecke et al. (35)**

13 **Figure 7: Neutral Stroop Publication Bias**

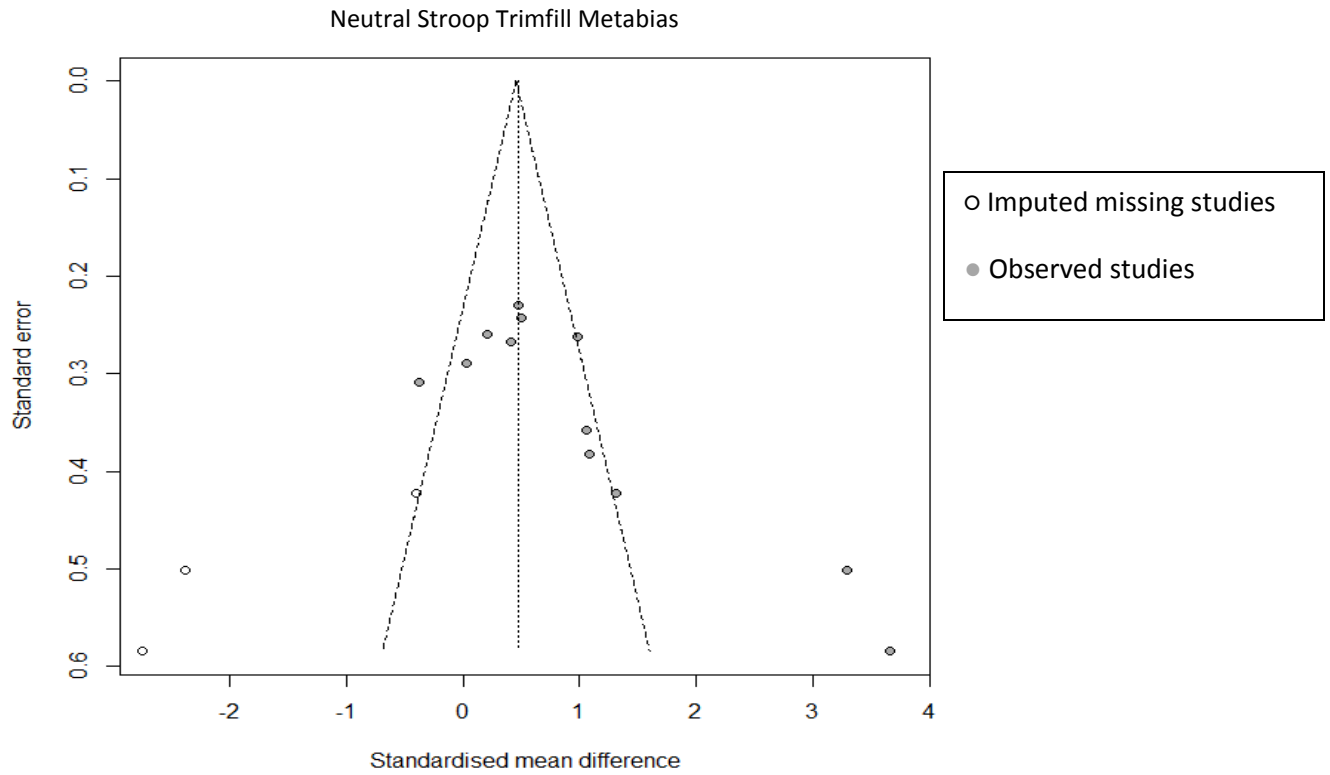

14

15 **Figure 8: Negative Stroop Publication Bias**

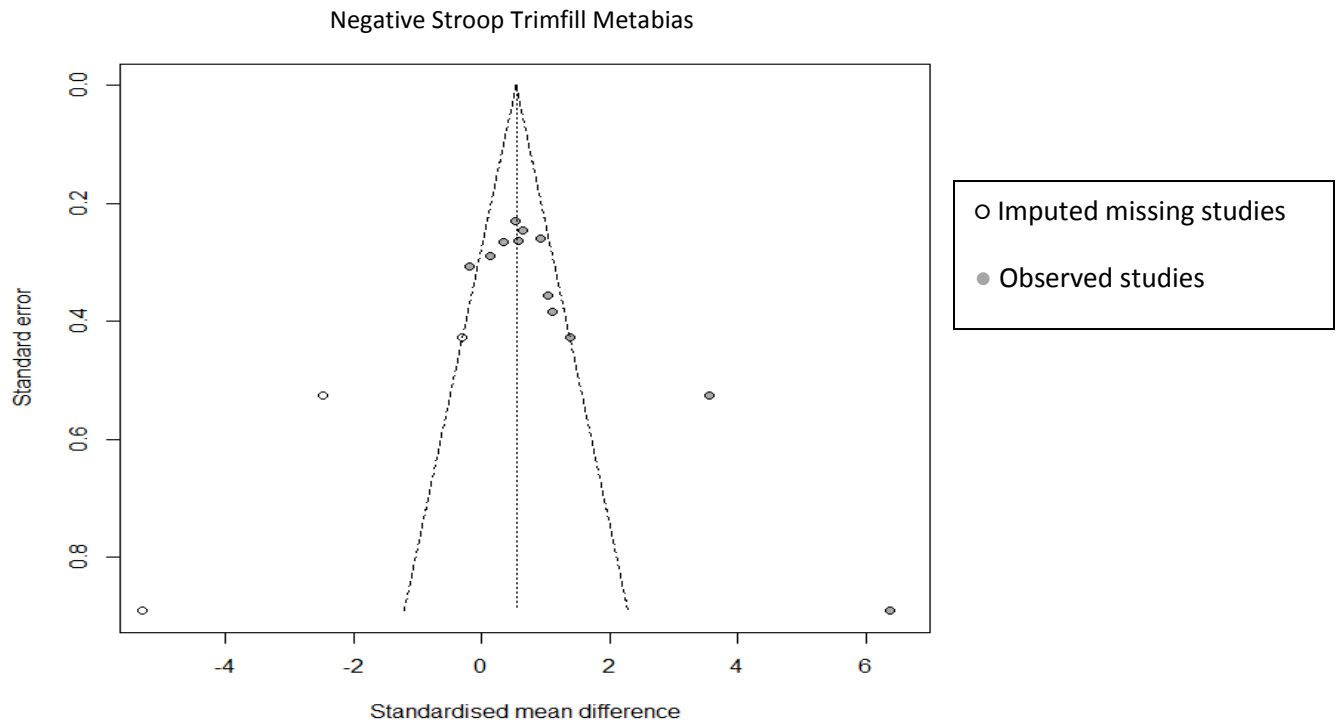

16
